# Supplementary material
Source: PubMed Central journal article supplement (PMC7410293)
Supplement: Supp_Fig1.pdf [file Supp_Fig1.pdf]

## Supplementary Data

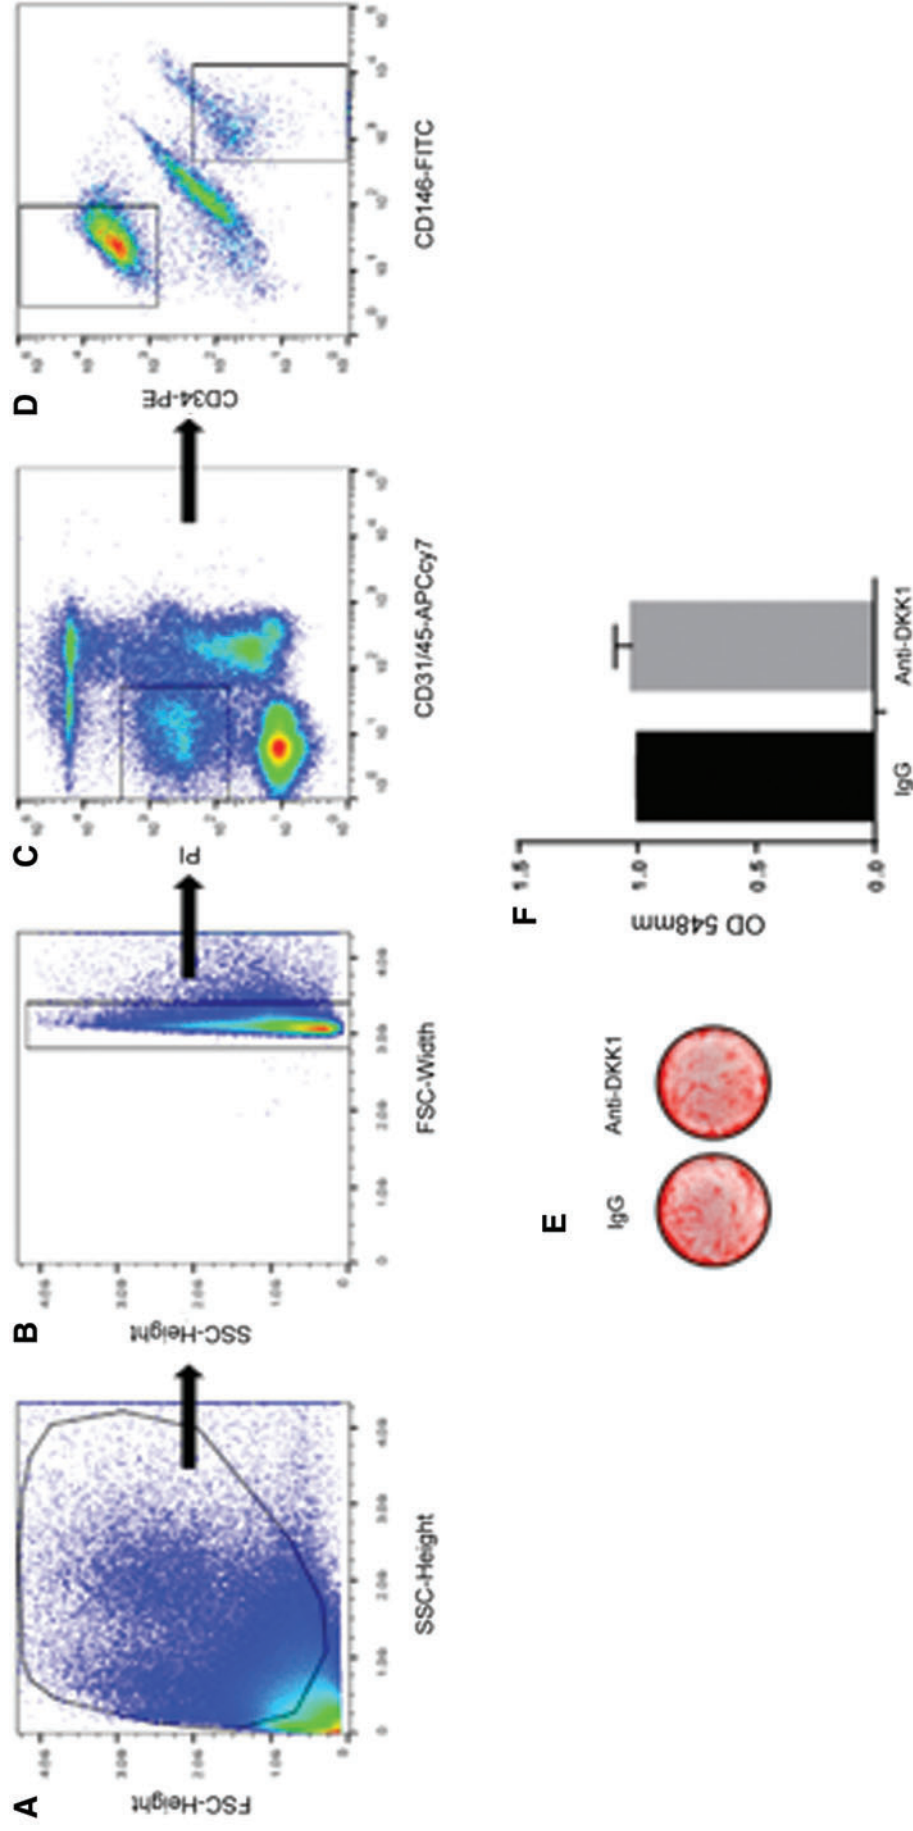

**SUPPLEMENTARY FIG. S1.** Effects of anti-DKK1 on human PSC osteogenic differentiation. (A–D) Purification of human PSCs by FACS, including (A) size characterization, (B) single cell selecting, (C) removal of PI-positive nonviable cells, CD31<sup>+</sup> or CD45<sup>+</sup> cells, and cell debris, and (D) isolation of perivascular stem cells, including CD146<sup>+</sup> pericytes and CD146<sup>+</sup> CD34<sup>+</sup> adventitial cells. (E, F) Alizarin red staining (E) and quantification (F) after 7 days of osteogenic differentiation with anti-DKK1 or IgG control (1 µg/mL). Whole well images shown. Experiments performed in at least experimental triplicate. FACS, fluorescent-activated cell sorting; PSC, perivascular stem cell.
