# Supplementary material
Source: PubMed Central journal article supplement (PMC7410293)
Supplement: Supp_Tables1-3.pdf [file Supp_Tables1-3.pdf]

SUPPLEMENTARY TABLE S1. PATIENT DEMOGRAPHICS

| <i>Sample No.</i> | <i>Gender</i> | <i>Age</i> | <i>Donor area</i> |
|-------------------|---------------|------------|-------------------|
| 1                 | Female        | 46         | Abdomen/Thigh     |
| 2                 | Female        | 57         | Abdomen/Thigh     |
| 3                 | Female        | 48         | Abdomen/Thigh     |
| 4                 | Female        | 42         | Abdomen/Thigh     |
| 5                 | Female        | 46         | Thigh             |

SUPPLEMENTARY TABLE S2. ANTIBODIES AND CYTOKINES USED

| <i>Antibody</i>                      | <i>Company</i>            | <i>Catalog no.</i> | <i>Use</i> |
|--------------------------------------|---------------------------|--------------------|------------|
| Mouse anti-human CD31                | BD Pharmingen             | 563653             | FACS       |
| Mouse anti-human CD45                | BD Pharmingen             | 557833             | FACS       |
| Mouse anti-human CD146               | Bio-Rad                   | MCA2141            | FACS       |
| Mouse anti-human CD34                | BD Pharmingen             | 555822             | FACS       |
| Anti-DKK1                            | R&D Systems               | AF1096             | N          |
| Anti-SOST                            | Bio-Rad                   | HCA230Z            | N          |
| Goat IgG                             | R&D Systems               | AB-108-C           | N          |
| Mouse IgG2a                          | R&D Systems               | ab185802           | N          |
| Anti- $\beta$ -catenin               | Cell Signaling Technology | 8480               | WB         |
| Anti-GAPDH                           | Cell Signaling Technology | 5174               | WB         |
| Anti-rabbit IgG, HRP-linked antibody | Cell Signaling Technology | 7074               | WB         |
| Dkk-1                                | R&D Systems               | 5439-DK            | C          |
| bFGF                                 | R&D Systems               | 233-FB             | C          |

C, cytokine; FACS, fluorescent-activated cell sorting; N, neutralization; WB, Western blot.

SUPPLEMENTARY TABLE S3. QUANTITATIVE POLYMERASE CHAIN REACTION PRIMERS USED

| <i>Gene</i>   | <i>Forward</i>          | <i>Reverse</i>          |
|---------------|-------------------------|-------------------------|
| <i>ALP</i>    | ACCACCACGAGAGTGAACCA    | CGTTGTCTGAGTACCAGTCCC   |
| <i>AXIN2</i>  | CAACACCAGGCGGAACGAA     | GCCCAATAAGGAGTGTAAGGACT |
| <i>CCND1</i>  | GCTGCGAAGTGGAAACCATC    | CCTCCTTCTGCACACATTTGAA  |
| <i>COL1A1</i> | GAGGGCCAAGACGAAGACATC   | CAGATCACGTCATCGCACAAAC  |
| <i>DKK1</i>   | ATAGCACCTTGGATGGGTATTCC | CTGATGACCCGGAGACAAACAG  |
| <i>GAPDH</i>  | CTGGGCTACACTGAGCACC     | AAGTGGTCGTTGAGGGCAATG   |
| <i>RUNX2</i>  | TGGTTACTGTCATGGCGGGTA   | TCTCAGATCGTTGAACCTTGCTA |
| <i>SOST</i>   | TTCCCCGGATGTTTGGCTAC    | AAGGGATGTGCTGGTCTGTG    |
